# Supplementary material
Source: publisher site journal article supplement (https://www.dovepress.com/get_supplementary_file.php?f=414161.docx)
Supplement: Supplementary file 1 [file get_supplementary_file.php]

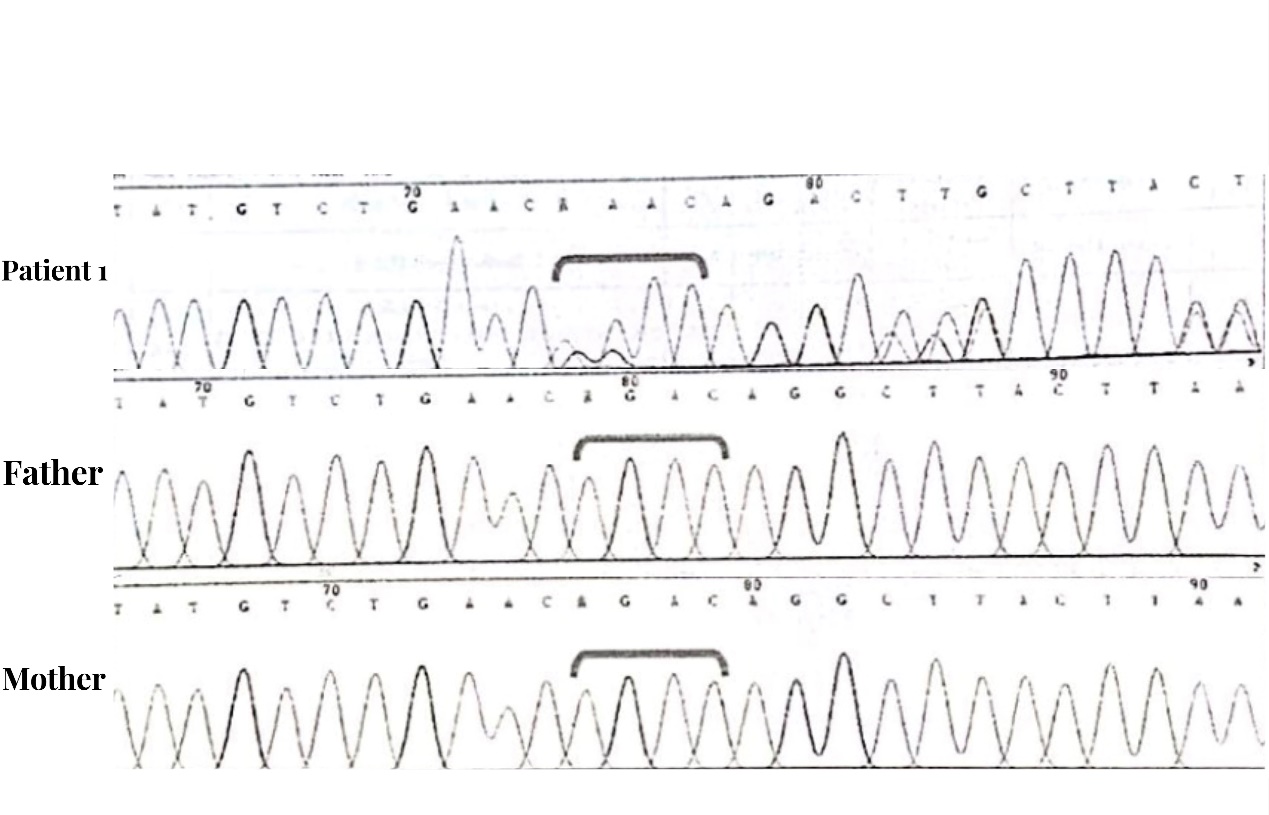


Supplementary Figure 1: Sanger sequencing of patient 1, mutation site is marked by the bar in the figure.


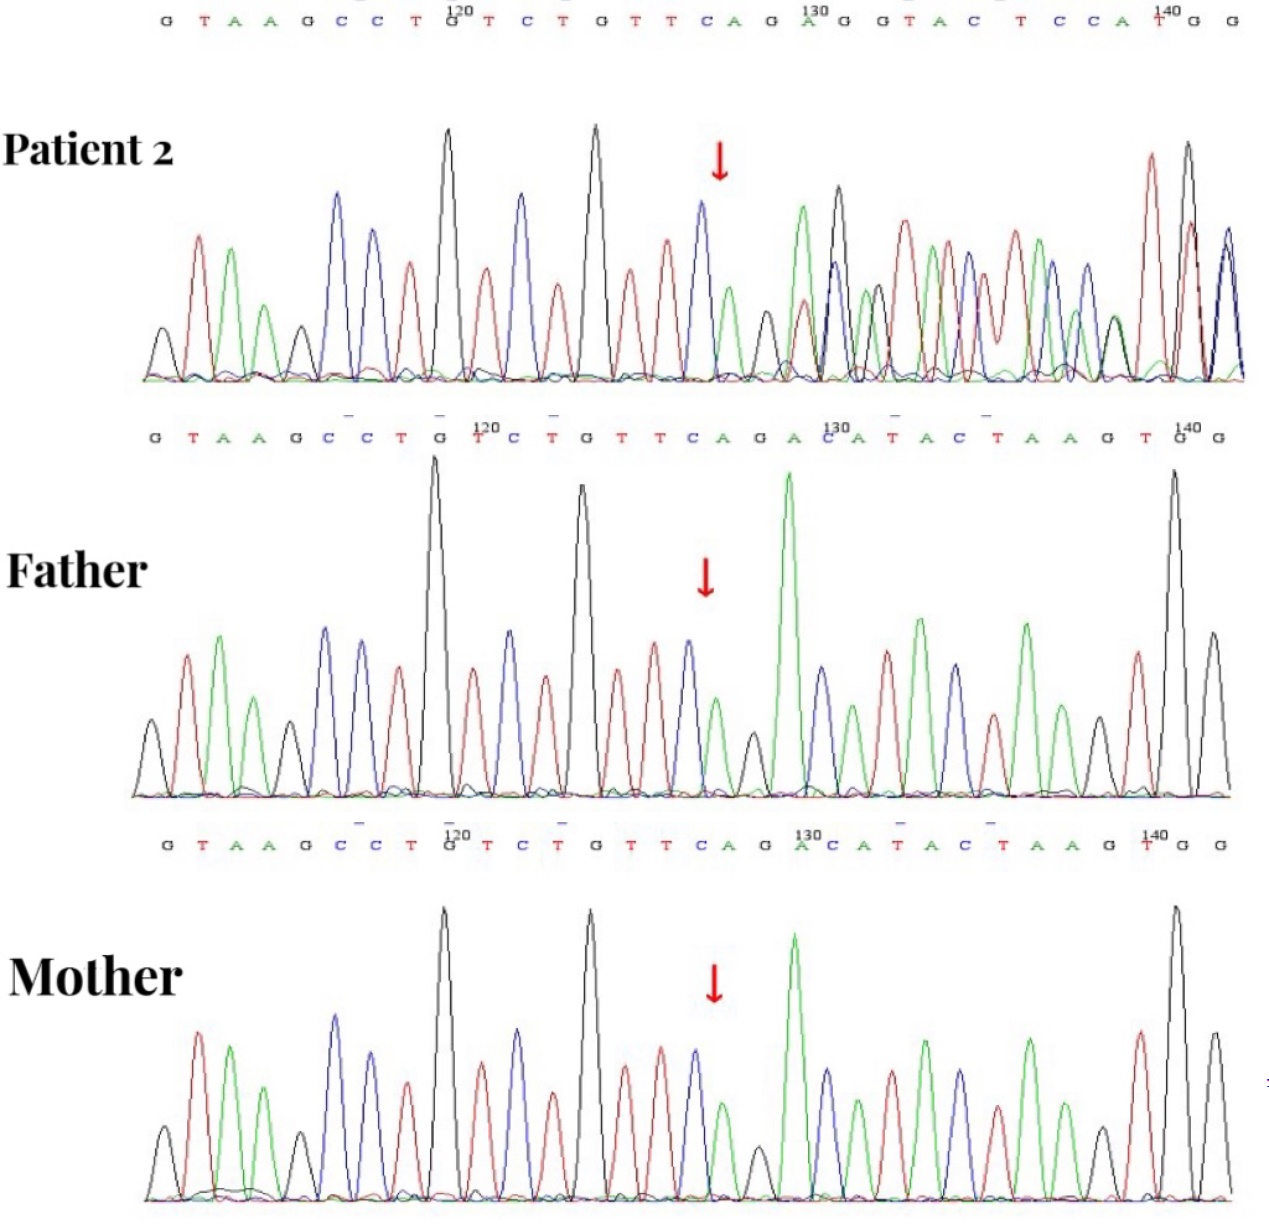


Supplementary Figure 2: Sanger sequencing of patient 2, the black, green, red, and blue colours represent the G, A, T, and C base sequences respectively, and the mutation site is marked by the red arrow.
